1 RUNNING HEAD: NITROGEN ENRICHMENT AND FUNGAL BEHAVIOR

2 **Fungi exposed to chronic nitrogen enrichment are less able to decay leaf litter**

3 Linda T.A. van Diepen<sup>1</sup>, Serita D. Frey<sup>1,3</sup>, Elizabeth A. Landis<sup>1</sup>,

4 Eric W. Morrison<sup>1</sup>, and Anne Pringle<sup>2</sup>

5 <sup>1</sup>Natural Resources and the Environment, University of New Hampshire, Durham, NH, 03824 USA

6 <sup>2</sup>Departments of Botany and Bacteriology, University of Wisconsin-Madison, Madison, WI, 53706 USA

7 <sup>3</sup>Corresponding author E-mail: [serita.frey@unh.edu](mailto:serita.frey@unh.edu); phone: 603-862-3880

8

9 *Abstract.* Saprotrophic fungi are the primary decomposers of plant litter in temperate forests, and  
10 their activity is critical for carbon (C) and nitrogen (N) cycling. Simulated atmospheric N  
11 deposition is associated with reduced fungal biomass, shifts in fungal community structure,  
12 slowed litter decay, and soil C accumulation. Although rarely studied, N deposition may also  
13 result in novel selective pressures on fungi, affecting evolutionary trajectories. To directly test if  
14 long-term N enrichment reshapes fungal behaviors, we isolated decomposer fungi from a long-  
15 term (28 year) N addition experiment and used a common garden approach to compare growth  
16 rates and decay abilities of isolates from control and N amended plots. Both growth and decay  
17 were significantly altered by long-term exposure to N enrichment. Changes in growth rates were  
18 idiosyncratic, but litter decay by N isolates was generally lower compared to control isolates of  
19 the same species, a response not readily reversed when N isolates were grown in control (low N)  
20 environments. Changes in fungal behaviors accompany and perhaps drive previously observed  
21 N-induced shifts in fungal diversity, community composition, and litter decay dynamics.

22 *Keywords:* *adaptation; common garden; evolution; fungi; global change; growth rate; litter*  
23 *decay; Harvard Forest; nitrogen deposition; phenotypic plasticity.*

## INTRODUCTION

24  
25  
26 The fungi are a megadiverse group of microbial species that play critical roles in  
27 biogeochemical cycles. Anthropogenically-mediated environmental changes are a serious threat  
28 to biological diversity and may result in novel selective pressures (Sala et al. 2000), but whether  
29 or how fungi are adapting to global change is largely unknown. Vulnerable fungi may move or  
30 go extinct in response to environmental stresses. Shifts in fungal phenology in response to  
31 climate change are documented (Boddy et al. 2014), as are fungal range expansions (Wolfe et al.  
32 2012). However, whether fungi are prone to extinction remains an open question, largely because  
33 conservation efforts rarely target fungi (Heilmann-Clausen et al. 2015). Species may also be  
34 tolerant of changes, either because the stresses are irrelevant to the species in question, or  
35 because the species can alter aspects of behavior or life history in response to changing  
36 environments (West-Eberhard 1989).

37 Fungi are not static entities, and fungal lineages can evolve on very short time scales. For  
38 example, individuals exposed to novel environments in the laboratory diverge and evolve over  
39 weeks or months (Schoustra et al. 2005; Leu and Murray 2006; Dettman et al. 2007, 2008).  
40 However, there is little research on the evolution of fungi in global change contexts, even though  
41 evolutionary dynamics may accompany or drive shifts in fungal diversity that occur in response  
42 to environmental change (Jaenike 1991; Avis et al. 2008; Bärlocher et al. 2008). As fungal  
43 lineages evolve in response to global change, the physiology and function of these species may  
44 change, and the evolutionary trajectories taken by individual lineages may aggregate to influence  
45 ecosystem scale processes.

46 Fungi are the primary drivers of decomposition in temperate forest systems (Gadd 2006), and  
47 altered rates of decomposition will directly influence future trajectories of climate change

48 (Kirschbaum 1995; Ise and Moorcroft 2006). Since saprotrophic fungi are the primary producers  
49 of the extracellular enzymes involved in cellulose and lignin (lignocellulose) decay, it may be  
50 especially critical to understand the evolution of saprotrophic fungi in global change contexts.  
51 Global change experiments, in which the abiotic environment is manipulated to simulate future  
52 scenarios of a particular (or multiple) global change driver(s) in the field, offer a unique  
53 opportunity to explore changes in species' behaviors relevant to ecosystem-scale processes,  
54 although these kinds of experiments are rarely used for this purpose (Bataillon et al. 2016). In  
55 this study, we use a long-term (28 year) simulated nitrogen (N) deposition experiment—the  
56 Chronic Nitrogen Amendment Study (CNAS) located at the Harvard Forest Long-Term  
57 Ecological Research (LTER) site in Petersham, MA, USA—to explore fungal behaviors in  
58 contexts of altered soil N availability. Although not originally designed as an artificial selection  
59 experiment, a continuous and consistent exposure to elevated N within treatment plots has likely  
60 acted as a novel selective pressure on fungi. Previous research from the CNAS shows that long-  
61 term N enrichment reduces fungal biomass, causes changes in fungal diversity and community  
62 composition (Frey et al. 2014; Morrison et al. 2016), slows plant litter decay (Magill and Aber  
63 1998), and results in a significant accumulation of soil organic matter (Frey et al. 2014).  
64 However, whether changes in fungal behaviors accompany or drive shifts in decomposition  
65 dynamics remains untested.

66 Here we investigated whether the saprotrophic fungi that grow on plant litter of N-enriched  
67 plots behave differently from the same species found in control plots. Have these isolates  
68 evolved, compared to isolates of the same species from control plots, and does that evolution  
69 impact decomposition? We first isolated fungi from decomposing plant litter in control and N-  
70 enriched plots and next used a common garden design to study the behaviors of these individuals

71 in their respective home and away environments. To measure potential changes in fungal  
72 behaviors, we first measured mycelial growth rate, often assumed to be an aspect of fitness  
73 (Pringle and Taylor 2002) and next measured the ability of isolates to decay plant litter. We  
74 compared isolates from the N treatments with isolates of the same species from control plots,  
75 growing all isolates in identical laboratory environments (the same “gardens”) where N  
76 availability was varied to reflect field conditions in the different N treatments at CNAS. Our  
77 working assumption was that if fungal isolates from N-enriched plots grew similarly to those  
78 from control plots when grown in a common environment, then isolates from treatment plots  
79 have not evolved. By contrast, if we found differences—if isolates from the N treatment plots  
80 showed consistent differences in growth and litter decay compared to control isolates—then data  
81 would suggest that the lineages isolated from N treatment plots are distinct and that treatment  
82 isolates have evolved to grow in the novel environments of the experimental plots.

### 83 METHODS

84 *Fungal cultures.* Fungi were isolated from decomposing leaf litter collected from each of  
85 three N addition treatments within the CNAS which was established in 1988 to examine the  
86 effects of simulated N deposition on ecosystem dynamics (Aber et al. 1993). The site is located  
87 in a mixed hardwood forest dominated by black and red oak (*Quercus velutina* and *Q. rubra*).  
88 The experiment consists of three 30 × 30 m plots which receive either ambient N deposition  
89 (control, N0) or an additional 50 (N50) or 150 (N150) kg N ha<sup>-1</sup> yr<sup>-1</sup>. The CNAS has resulted in a  
90 wealth of data (Aber et al. 1993; Magill et al. 2004; Frey et al. 2004; Frey et al. 2014; Morrison  
91 et al. 2016), and while it has been criticized for pseudo-replication, it remains one of the longest  
92 running N addition experiments in existence. For this reason, it is a particularly appropriate  
93 choice for experiments exploring fungal evolution where the continuous and consistent exposure

94 to elevated N has likely acted as a novel selective pressure on the fungi growing within the plots.  
95 While soil fungi occasionally grow very large (Smith et al. 1992) and it is possible that a single  
96 individual could grow between plots, the plots are large enough to encompass the entire canopies  
97 and root structures of multiple individual trees (>100 in each plot; Fig. S1) and would, by  
98 extension, house the fungal communities associated with these trees, especially saprotrophic taxa  
99 housed within individual decomposing leaves and litter patches.

100 Litter samples for culturing fungi were obtained from a litterbag experiment described in  
101 van Diepen et al. (2015). The culture media used to isolate fungi and the protocol used to  
102 identify them are detailed in the Supplementary Information. Briefly, we targeted those fungal  
103 species that were isolated from both the control and N treatment plots. To minimize the  
104 probability of using the same individual twice, we never used more than one isolate of a species  
105 from the same litterbag and made sure that isolates of the same species came from different  
106 litterbags collected at least 5 m apart. Approximately 1500 isolates were cultured, and in this  
107 isolate collection, more than 100 different morphologies were distinguishable. A subset of 60  
108 morphologies was found in both the control and at least one N treatment, and following  
109 identification using the internal transcribed spacer (ITS) barcode, the different morphologies  
110 grouped into a collection of 41 different species. The majority of species were from the phylum  
111 Ascomycota or Zygomycota, and 21 species (51%) matched an operational taxonomic unit  
112 (OTU) found in a high-throughput sequencing dataset (Morrison et al. in prep) obtained from the  
113 same litterbags. Nineteen of these 21 species had either representative isolates from all three  
114 field treatments or representatives from the control and one of the N treatments. Subsequent  
115 experiments targeted ten ascomycetes (Supplementary Table S1). All were 1) identified and  
116 grouped using the ITS barcode, 2) found in the high-throughput sequencing dataset (providing a

117 context for future work) and 3) found in the control and at least one N treatment plot. In the  
118 sequencing dataset, the relative abundances of the ten taxa ranged from 0.01 to 1.2% (Table S1),  
119 typical for saprotrophic taxa at our site (Morrison et al. 2016). Collectively, the relative  
120 abundance of these taxa was 1.4% in the control treatment, increasing to 1.9 and 3.9% in the N50  
121 and N150 treatments, respectively. We also included one basidiomycete in this study, although  
122 basidiomycetes were harder to culture as they were mostly outgrown by ascomycetes on all  
123 culture media. To facilitate communication, we assigned a provisional name to each group of  
124 isolates based on the best match to a voucher species within NCBI, with a minimum requirement  
125 of 97% sequence similarity and a bit score of 800 (Table S1). From this point forward, we refer  
126 to each of our species using its provisional generic epithet. Seven of the 11 selected taxa were  
127 available as multiple biological replicates (more than one isolate was found in each plot). Eight  
128 of the species were cultured from all three N treatments, but two (*Discosia* and *Phacidium*) were  
129 only isolated from the control and N50 treatments and one (*Irpex*) was only isolated from the  
130 control and N150 treatments.

131 *Fungal growth and litter decay.* To measure potential changes in the physiology of isolates,  
132 we compared the behaviors of isolates from the two N treatments (N isolates) with isolates of the  
133 same species collected from the control treatment (control isolates). We use the term “isolate  
134 origin” to indicate the field treatment (N0, N50, or N150) from which each culture was isolated  
135 and “laboratory environment” to indicate the N treatment simulated by our common garden  
136 experiment (described below). Isolates from the control treatment were grown in their home  
137 environment, as well as N50 and N150 (away) environments, and isolates from the N treatments  
138 were grown in the control (away) environment and their home (N50 or N150) environment.

139 Mycelial growth rates are often used as a measure of fungal fitness (Pringle and Taylor  
140 2002). Here we compared mycelial growth rates among isolates of the same species by growing  
141 them at 25°C in darkness in ‘race tubes’ (sensu White and Woodward 1995) created by filling  
142 serological pipettes with a horizontal strip of culture medium: 1.5% potato dextrose agar  
143 dissolved in half-strength Hoagland nutrient solution supplemented with inorganic N at levels  
144 representative of the available N ( $\text{NH}_4 + \text{NO}_3$ ) in the organic soil horizon of each respective field  
145 treatment (Supplementary Fig. S2). Growth was measured daily until each isolate reached the  
146 end of its race tube when growth rate was calculated in  $\text{mm day}^{-1}$ . We ran three laboratory  
147 replicates per biological isolate in each environment, and whenever possible, growth rates were  
148 calculated for the multiple biological replicates per species isolated from each field treatment.

149 To test the ability of the fungal isolates to decompose plant litter, we used a common garden  
150 approach where fungi isolated from both control and N enriched field plots were grown in the  
151 laboratory in their respective home and away environments. Petri dishes were filled with 30 ml  
152 of culture medium (1.5% agar dissolved in half-strength Hoagland nutrient solution) which was  
153 then covered with ~0.75 g of sterile oak litter (Fig. S3a). The underlying medium mimicked the  
154 organic ( $\text{O}_e/\text{O}_a$ ) horizon in the field plots, with N levels representative of available N ( $\text{NH}_4 +$   
155  $\text{NO}_3$ ) within each of the three field treatments (N0, N50, or N150), while the oak litter mimicked  
156 the  $\text{O}_i$  (litter) layer. Fresh oak litter was collected from each treatment plot using litter traps.  
157 Collected oak litter was air dried at room temperature and the leaves cut into ~2 x 2 cm pieces  
158 after stem removal. Before use, litter was oven-dried (60°C for 48 hours) and subsequently  
159 sterilized (three rounds of autoclaving at 121°C). Because these experiments were extraordinarily  
160 time intensive, we made the deliberate choice to include more species with a single biological  
161 replicate each, rather than fewer species with more biological replicates. We manipulated one

162 biological replicate per species per treatment and ran three lab replicates for each isolate in each  
163 of its test environments, with the exception of *Trichoderma koningii* for which we used three  
164 independent biological isolates per treatment for an initial proof-of-concept study. Each Petri  
165 dish was inoculated with one plug of an isolate's stock culture placed on top of the litter at the  
166 center of each plate (Fig. S3a). Petri dishes were incubated for seven weeks at 25°C in darkness  
167 (Fig. S3b). At harvest, all litter was removed from each Petri dish by hand using forceps,  
168 weighed, and subsequently oven dried at 60°C for 48 hr to determine moisture content. The  
169 ability of each isolate to decay litter in each environment was calculated as percent litter mass  
170 loss (dry wt basis).

171 *Statistical analyses.* Two-way analysis of variance (ANOVA) was used to test whether long-  
172 term exposure to N enrichment significantly affected the growth rate or litter mass loss  
173 associated with each species, with isolate origin and laboratory environment as independent  
174 variables (R version 3.0.1, R Core Team, 2013). We compared the responses of N50 or N150  
175 isolates with control isolates of the same species. When interactions between isolate origin and  
176 laboratory environment were significant, we analyzed the data of each environment separately to  
177 test if isolates of different origin behaved differently in a common environment. When  
178 necessary, variables were transformed to ensure a normal distribution and homogeneity of  
179 variance. Using the same approach, we also tested for a general fungal response, by pooling the  
180 data across all species.

## 181 RESULTS AND DISCUSSION

182 Global change experiments offer a unique opportunity to investigate and record evolutionary  
183 responses to rapid environmental change in the field, but their potential remains largely  
184 unexploited (Weese et al. 2015; Bataillon et al. 2016). Microbial evolution is likely to impact



185 critical ecosystem processes, including organic matter decomposition. We tested whether chronic  
186 soil N enrichment has affected the ability of diverse fungi to decompose plant material. Using a  
187 common garden approach, we grew control and N-exposed fungi isolated from a 28 year  
188 simulated N deposition experiment in identical laboratory environments to test whether fungi  
189 exposed to chronic N enrichment consistently grow differently, or decompose litter differently,  
190 compared to control fungi. Experiments tested whether environment is the main driver of  
191 behaviors by comparing the same individuals across different laboratory environments, while  
192 simultaneously testing whether the identity of the individuals themselves is instead the main  
193 driver of behaviors by comparing different individuals isolated from different treatment plots  
194 (from control plots or N exposed plots) in the same laboratory environments (the same  
195 “gardens”). To our knowledge, this study is the first to test if and how fungal behaviors relevant  
196 to a critical ecosystem process evolve in response to long-term environmental change.

197 *Growth rates.* All species grew with a single growth front and in a consistent linear fashion  
198 along race tubes, except *Cladosporium* whose growth was patchily distributed throughout the  
199 race tubes. This growth pattern made it impossible to calculate a growth rate and so this species  
200 was excluded from subsequent growth rate analyses. The remaining species grew at very  
201 different rates; the rapidly growing *Trichoderma* raced at  $\sim 22 \text{ mm dy}^{-1}$  while growth rates of the  
202 other species ranged from 1.0 to 10  $\text{mm dy}^{-1}$ .

203 While biological replicates of a species from a specific treatment plot behaved similarly to  
204 each other, different species showed idiosyncratic growth responses, with one species  
205 (*Paraconiothyrium*) exhibiting faster growth of N isolates compared to control isolates and two  
206 species (*Cylindrium*, *Trichoderma*) showing slower growth (Fig. 1). Two species (*Alternaria*,  
207 *Discosia*) showed no response of long-term N enrichment on growth rate, while four species

208 (*Epicoccum* I and II, *Pestalotiopsis*, *Phacidium*) showed mixed results. Thus the majority of  
209 ascomycete species proved sensitive to chronic N additions, with isolates from N amended plots  
210 growing differently (faster or slower) from control isolates, even when N isolates were grown in  
211 the away (control, low N) environment. However, the direction of change was not predictable,  
212 with the average response being no effect. The basidiomycete *Irpex* showed significantly higher  
213 growth rates for the N isolates (9.8-10 mm dy<sup>-1</sup>) in both their home (N150) and away (N0,  
214 control) environments compared to the control isolates (7.6-7.8 mm dy<sup>-1</sup>; origin:  $P < 0.0001$ ,  
215 environment:  $P = 0.1976$ ; Fig. 2A).

216 *Litter decay.* While growth responses were inconsistent, the capacity to decay plant litter,  
217 potentially a more relevant measure of ecosystem function, was significantly and consistently  
218 less for fungi isolated from N enriched plots compared to the same species isolated from the  
219 control treatment. Mass loss of litter averaged 19.6-34.9% for the white-rot fungus *Irpex*,  
220 compared to 7.0-12.6% for the ascomycete species (Figs. 2B and 3), which is not surprising  
221 since white-rot fungi can typically fully decompose lignocellulose, while most ascomycetes  
222 specialize in cellulose breakdown and only partially decompose lignin. Mass loss for litter  
223 decomposed by N isolates of *Irpex* was significantly lower compared to control isolates and this  
224 result was independent of the laboratory environment in which the isolates were grown (origin:  $P$   
225  $< 0.0001$ ; environment:  $P = 0.3803$ ; Fig. 2B). Mass loss for litter decomposed by ascomycete  
226 species was on average 17.9 and 26.2% lower for N50 and N150 isolates, respectively, compared  
227 to control isolates (Fig. 3). While isolate origin was significant ( $P < 0.01$ ), there was no  
228 significant origin  $\times$  environment interaction, meaning that N50 and N150 isolates decomposed  
229 litter more slowly than control (N0) isolates, irrespective of the laboratory environment in which  
230 they were grown (Fig. 3 inset). In terms of species-level responses, *Cylindrium* proved to be an

231 exception and the only species able to decay litter more effectively after exposure to chronic N  
232 enrichment and this was only for isolates collected from the highest N addition (N150) treatment.  
233 There was no relationship between litter mass loss and growth rates ( $r^2 = 0.04$ ;  $P = 0.1063$ ; Fig.  
234 S4), suggesting that growth rate, as measured here, is not a useful predictor of decay dynamics.

235 *Synthesis.* In the aggregate, our data suggest that fungi growing in N enriched plots have  
236 evolved and are less able to decompose plant litter than the same species growing in control  
237 plots. Individual fungal isolates behaved consistently across home and away environments; an  
238 isolate less able to decompose in one environment was less able to decompose in all  
239 environments. Isolates from N treatment plots were generally less able to decay litter than  
240 isolates of the same species from control plots, and the behaviors of these N isolates did not  
241 revert or resemble control isolate behaviors even when the N isolates were grown in control  
242 environments. An especially striking difference was recorded among isolates of the  
243 basidiomycete, lignin-degrading species *Irpex*; litter mass loss was 30-44% lower for the N  
244 isolates compared to the control isolates in both control and N enriched laboratory environments.

245 Whether or how these altered behaviors will benefit a fungus remains untested and would  
246 require the tracking of entire life cycles in nature. The mechanism causing behavioral changes  
247 also remains unknown. Changes may be mediated by altered patterns of gene expression,  
248 including, for example, gene expression alterations caused by novel patterns of DNA  
249 methylation; changes in allele frequencies between the populations of control and N treatment  
250 plots so that rare alleles become dominant in treatment plots; novel DNA sequence evolution  
251 with downstream effects on enzyme functions; or some combination of these or additional  
252 forces. Regardless of mechanism, it appears that long-term exposure to chronic N additions may  
253 have acted as a novel selective pressure on the behaviors of these saprotrophic fungi. And while

254 there may be gene flow across field treatment plots, the fact that we found consistent changes in  
255 species behaviors suggests that whatever dispersal there is among plots is not enough to counter  
256 natural selection. Our data connect to a classic literature on plant adaptation, including  
257 experiments documenting rapid adaptation to pollution and across sharp clines or adjacent  
258 treatment plots (e.g., Snaydon and Davies 1982). Early research on the heavy metal tolerance of  
259 plants growing on toxic mine spoils (Antonovics et al. 1971) served to both document plant  
260 adaptation to environmental change and provide evidence for genetic differences among closely  
261 spaced populations. The fungal behaviors described here are clearly an analogous result.

262 Previous research at the CNAS has demonstrated that N enrichment increases the species  
263 richness and diversity of ascomycetes generally (cellulose degraders), with an especially  
264 pronounced effect on the relative abundance of several ascomycete genera (*Trichophyton*,  
265 *Phialophora*, *Hypocrea/Trichoderma*, and *Rhizoscyphus* spp.) (Morrison et al. 2016). Others  
266 have also observed increased ascomycete richness and abundance with soil N enrichment  
267 (Allison et al. 2007; Weber et al. 2013). A shift in the fungal community toward taxa whose  
268 primary niche appears to be cellulose (rather than lignin) decay coupled with the fundamental  
269 changes in fungal behaviors we observed here (among ascomycetes and a basidiomycete) may  
270 accompany or perhaps even drive previously observed N-induced declines in fungal biomass,  
271 ligninolytic enzyme activity, and plant litter decay (Magill and Aber, 1998; Frey et al. 2004,  
272 2014). Because observed changes in decay abilities were not readily reversed when N isolates  
273 were grown in control environments, whether or how quickly a fungal community will recover  
274 following the cessation of N enrichment emerges as another critical, unanswered question.  
275 Meanwhile, and for as long as N pollution continues to be a feature of our rapidly changing

276 world, the evolution of fungal behaviors in these novel selective contexts will likely shape  
277 ecosystem function.

## 278 ACKNOWLEDGMENTS

279 This work was supported by a National Science Foundation grant (DEB-1021063) to  
280 SDF and AP, a NSF Graduate Research Fellowship grant (DGE-1325256) to EAL, and by the  
281 NSF Long-Term Ecological Research (LTER) Program at Harvard Forest. Special thanks to  
282 Lisa Graichen, Mel Knorr, and Meghan Thornton for lab assistance.

## 283 LITERATURE CITED

- 284 Aber, J. D., A. Magill, R. Boone, J. M. Melillo, P. Steudler, and R. Bowden. 1993. Plant and soil  
285 responses to chronic nitrogen additions at the Harvard Forest, Massachusetts. *Ecological*  
286 *Applications* 3:156–166.
- 287 Allison S. D., C. A. Hanson, and K. K. Treseder. 2007. Nitrogen fertilization reduces diversity  
288 and alters community structure of active fungi in boreal ecosystems. *Soil Biology and*  
289 *Biochemistry* 39:1878–1887.
- 290 Antonovics, J., A. D. Bradshaw, and R. G. Turner. 1971. Heavy metal tolerance in plants.  
291 *Advances in Ecological Research* 7:1-85.
- 292 Avis, P. G., G. M. Mueller, and J. Lussenhop. 2008. Ectomycorrhizal fungal communities in two  
293 North American oak forests respond to nitrogen addition. *New Phytologist* 179:472–483.
- 294 Bärlocher, F., S. Seena, K. P. Wilson, and D. D. Williams. 2008. Raised water temperature  
295 lowers diversity of hyporheic aquatic hyphomycetes. *Freshwater Biology* 53:368–379.
- 296 Bataillon, T. et al. 2016. A replicated climate change field experiment reveals rapid evolutionary  
297 response in an ecologically important soil invertebrate. *Global Change Biology* 22:2370–  
298 2379.

- 299 Boddy, L., U. Büntgen, S. Egli, A. C. Gange, E. Heegaard, P. M. Kirk, A. Mohammad, and H.  
300 Kausserud. 2014. Climate variation effects on fungal fruiting. *Fungal Ecology* 10:20–33.
- 301 Dettman, J. R., J. B. Anderson, and L. M. Kohn. 2008. Divergent adaptation promotes  
302 reproductive isolation among experimental populations of the filamentous fungus  
303 *Neurospora*. *BMC Evolutionary Biology* 8:35.
- 304 Dettman, J. R., C. Sirjusingh, L. M. Kohn, and J. B. Anderson. 2007. Incipient speciation by  
305 divergent adaptation and antagonistic epistasis in yeast. *Nature* 447:585-588.
- 306 Frey, S. D., M. Knorr, J. Parrent, and R. T. Simpson. 2004. Chronic nitrogen enrichment affects  
307 the structure and function of the soil microbial community in a forest ecosystem. *Forest  
308 Ecology and Management* 196:159–171.
- 309 Frey, S. D., et al. 2014. Chronic nitrogen additions suppress decomposition and sequester soil  
310 carbon in a temperate forest. *Biogeochemistry* 121:305–316.
- 311 Gadd, G. M. 2006. *Fungi in biogeochemical cycles*. Cambridge University Press. Cambridge,  
312 UK.
- 313 Heilmann-Clausen, J., E. S. Barron, L. Boddy, A. Dahlberg, G. W. Griffith, J. Nordén, O.  
314 Ovaskainen, C. Perini, B. Senn-Irlet, and P. Halme. 2015. A fungal perspective on  
315 conservation biology. *Conservation Biology* 29:61–68.
- 316 Ise, T., and P. R. Moorcraft. 2006. The global-scale temperature and moisture dependencies of  
317 soil organic carbon decomposition: an analysis using a mechanistic decomposition model.  
318 *Biogeochemistry* 80:217–231.
- 319 Jaenike, J., 1991. Mass extinction of European fungi. *Trends in Ecology & Evolution* 6:174–175.
- 320 Kirschbaum, M. U. F. 1995. The temperature dependence of soil organic matter decomposition,  
321 and the effect of global warming on soil organic C storage. *Soil Biology and Biochemistry*

- 322 27:753-760.
- 323 Leu, J.-Y., and A. W. Murray. 2006. Experimental evolution of mating discrimination in budding  
324 yeast. *Current Biology* 16:280–286.
- 325 Magill, A. H., and J. D. Aber. 1998. Long-term effects of experimental nitrogen additions on  
326 foliar litter decay and humus formation in forest ecosystems. *Plant and Soil* 203:301–311.
- 327 Magill, A.H., J. D. Aber, W.S. Currie, K. J. Nadelhoffer, M. E. Martin, W. H. McDowell, J. M.  
328 Melillo, and P. Steudler. 2004. Ecosystem response to 15 years of chronic nitrogen additions  
329 at the Harvard Forest LTER, Massachusetts, USA. *Forest Ecology and Management* 196:7–  
330 28.
- 331 Morrison, E. W., S. D. Frey, J. J. Sadowsky, L. T. A. van Diepen, W. K. Thomas, and A. Pringle.  
332 2016. Chronic nitrogen additions fundamentally restructure the soil fungal community in a  
333 temperate forest. *Fungal Ecology* 23:48–57.
- 334 Pringle, A., and J. W. Taylor. 2002. The fitness of filamentous fungi. *Trends in Microbiology*  
335 10:474-481.
- 336 R Core Team. 2013. R: a language and environment for statistical computing. R Foundation for  
337 Statistical Computing, Vienna, Austria.
- 338 Sala, O. E., et al. 2000. Biodiversity - Global biodiversity scenarios for the year 2100. *Science*  
339 287:1770–1774.
- 340 Schoustra, S. E., M. Slakhorst, A. J. M. Debets, and R. F. Hoekstra. 2005. Comparing artificial  
341 and natural selection in rate of adaptation to genetic stress in *Aspergillus nidulans*. *Journal of*  
342 *Evolutionary Biology* 18:771–778.
- 343 Smith, M. L., J. N. Bruhn, and J. B. Anderson. 1992. The fungus *Armillaria bulbosa* is among  
344 the largest and oldest living organisms. *Nature* 356:428–431.

- 345 Snaydon, R. W., and Davies, T. M. 1982. Rapid divergence of plant populations in response to  
346 recent changes in soil conditions. *Evolution* 36:289–297.
- 347 van Diepen, L. T. A., S. D. Frey, C. M. Sthultz, E. W. Morrison, R. Minocha, and A. Pringle.  
348 2015. Changes in litter quality caused by simulated nitrogen deposition reinforce the N-  
349 induced suppression of litter decay. *Ecosphere* 6(10):205.
- 350 Weber, C. F., R. Vilgalys, and C. R. Kuske. 2013. Changes in fungal community composition in  
351 response to elevated atmospheric CO<sub>2</sub> and nitrogen fertilization varies with soil horizon.  
352 *Frontiers in Microbiology* 4:78.
- 353 Weese, D. J., K. D. Heath, B. T. M. Dentinger, and J. A. Lau. 2015. Long-term nitrogen addition  
354 causes the evolution of less-cooperative mutualists. *Evolution* 69-3:631–642.
- 355 West-Eberhard, M. J. 1989. Phenotypic plasticity and the origins of diversity. *Annual Review of*  
356 *Ecology and Systematics* 20:249–278.
- 357 White, B., and D. Woodward. 1995. A simple method for making disposable race tubes. *Fungal*  
358 *Genetics Newsletter* 42:79.
- 359 Wolfe, B. E., M. Kuo, and A. Pringle. 2012. *Amanita thiersii* is a saprotrophic fungus expanding  
360 its range in the United States. *Mycologia* 104:22–33.

361 SUPPORTING INFORMATION

362 Additional supporting information may be found in the online version of this article at  
363 <http://onlinelibrary.wiley.com/>.

364



## FIGURE LEGENDS

365 **FIG. 1.** Percent change in growth rates of cellulolytic ascomycetes following long-term exposure  
366 to soil N enrichment. Open and filled circles represent N50 or N150 isolates, respectively,  
367 compared to control (N0) isolates. Note *Discosia* and *Phacidium* were only isolated from control  
368 plots and one of the two N treatment plots. Error bars are 95% confidence intervals. When error  
369 bars do not overlap with zero, the change in growth rate is significant at  $\alpha < 0.05$ . Because there  
370 was a significant statistical interaction between isolate origin and laboratory (common garden)  
371 environment for *Epicoccum 1* and *Phacidium*, the growth rates of these species in each of the lab  
372 environments are shown separately.

373 **FIG. 2.** Mycelial growth rate (A) and litter mass loss (B) (mean and SE) for the white rot  
374 basidiomycete *Irpex* grown in home and away environments. Isolates of *Irpex* were not cultured  
375 from the N50 treatment.

376 **FIG. 3.** Percent change in litter decay capacities of cellulolytic ascomycetes following long-term  
377 exposure to soil N enrichment. Open and filled circles represent N50 or N150 isolates,  
378 respectively, compared to control (N0) isolates. Note *Discosia* and *Phacidium* were only isolated  
379 from control plots and one of the two N treatment plots. Error bars are 95% confidence intervals.  
380 When error bars do not overlap with zero, the change in litter mass loss is significant at  $\alpha < 0.05$ .  
381 There were no significant interactions between isolate origin and laboratory environment. Inset  
382 graph on right shows litter mass loss averaged across all ascomycete species grown in their home  
383 versus away environment. Error bars indicate one standard error of the mean.

384

385

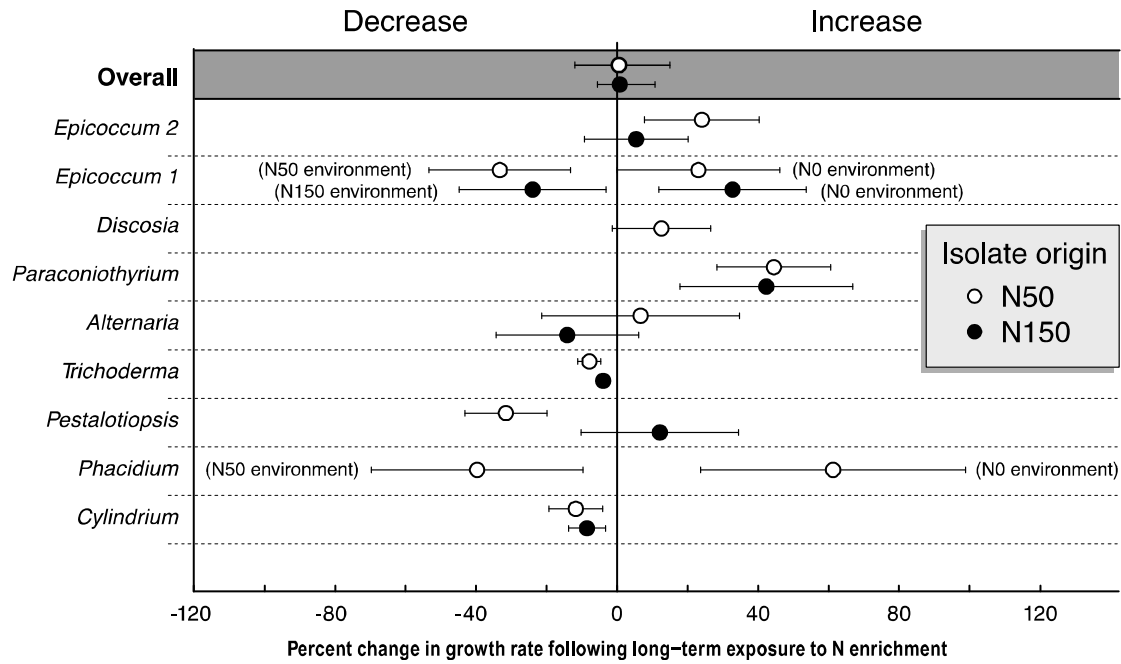

386

387 FIG. 1.

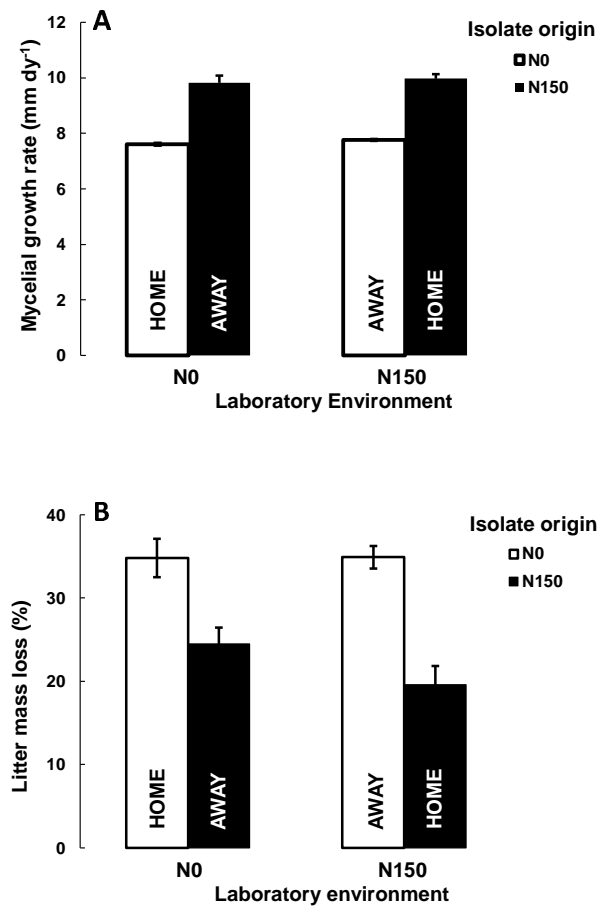

388

389

390 FIG. 2.

391

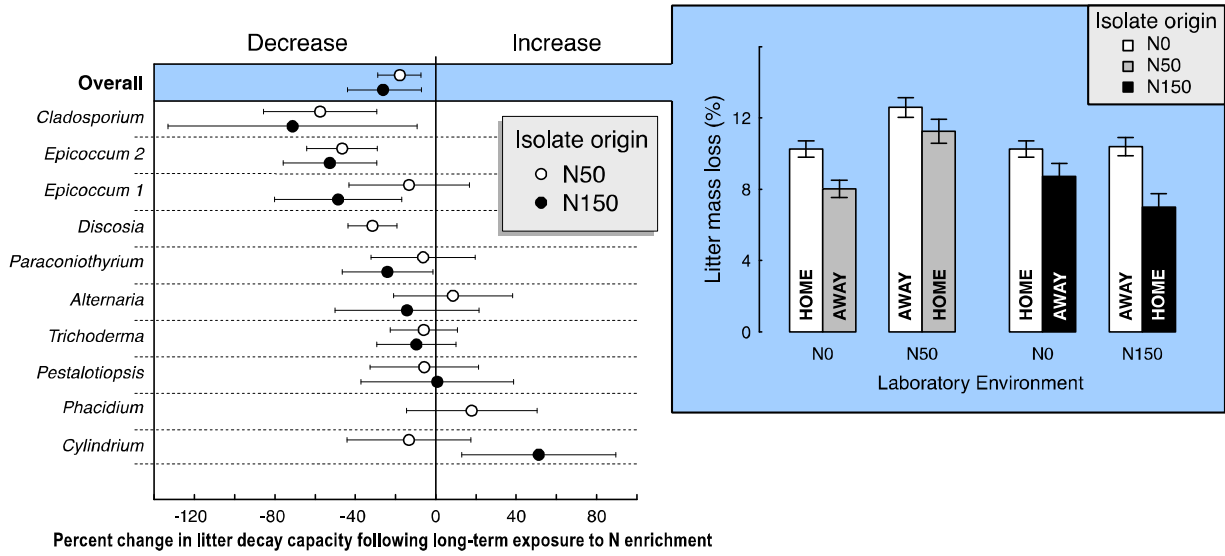

392

393 FIG. 3.

394
